# Supplementary material
Source: publisher figshare collection journal article supplement (https://sage.figshare.com/ndownloader/files/17682548)
Supplement: Supplementary file 1 [file 17682548]

# Efficacy of Proximal Resin Infiltration on Caries Inhibition: Results from a 3-Year Randomized Controlled Clinical Trial

Peters MC, Hopkins AR, Zhu L, Yu Q

## APPENDIX

## CONSORT Flow Diagram

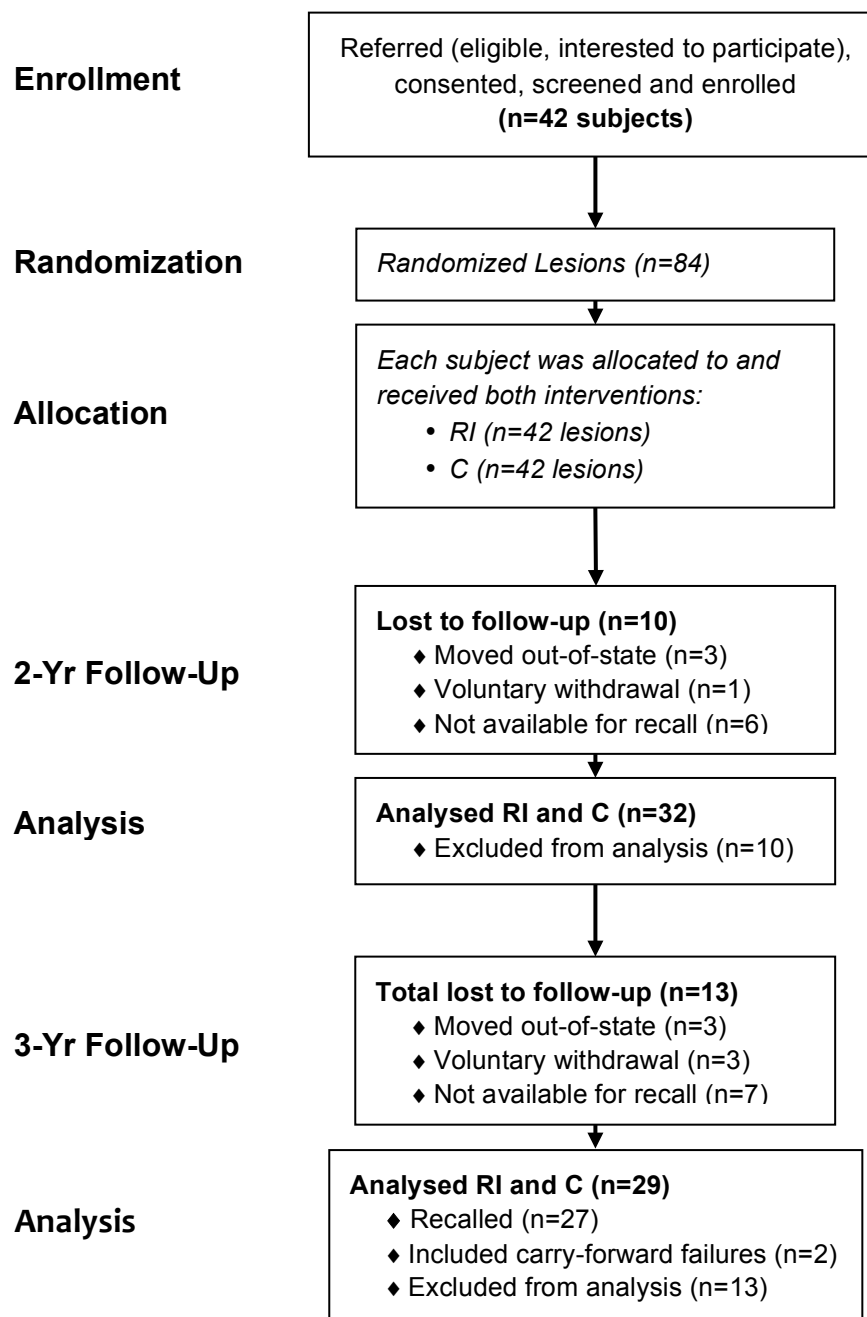

**Appendix Figure 1.** Study flow diagram of the within-person study design: 84 lesions were randomized in 42 subjects, each receiving both interventions infiltration (RI) and control (C).



## ITT – Analyses

**Appendix Table 1**

| <b>LESION DEPTH</b>      | <b>Impute1</b> | <b>Impute2</b> | <b>Impute3</b> | <b>Impute4</b> | <b>Impute5</b> |
|--------------------------|----------------|----------------|----------------|----------------|----------------|
| <b>One-sided P-value</b> | 0.1334         | 0.3872         | 0.1334         | 0.19385        | 0.1133         |

Three-year categorical depth scores (N=29) showed no difference between treatment groups (McNemar:  $P = .172$ ). ITT-analysis: 5 imputed datasets showed all P-values  $> .05$ , confirming no difference between groups RI and C.

The Mantel-Haenszel odds ratio obtained from observed data is 0.4286 with 95% confidence interval from 0.1108 to 1.6573. The odds of lesion progression in treatment group RI were 57% less than that in treatment group C.

**Appendix Table 2**

| <b>PAIRWISE ASSESSMENT</b> | <b>Impute1</b> | <b>Impute2</b> | <b>Impute3</b> | <b>Impute4</b> | <b>Impute5</b> |
|----------------------------|----------------|----------------|----------------|----------------|----------------|
| <b>One-sided P-value</b>   | 0.0176         | 0.01125        | 0.0384         | 0.0176         | 0.0327         |

At 3yr-recall, RI-lesions showed significantly less caries progression than C-lesions (McNemar:  $P = .033$ ). ITT-analysis: 5 imputed datasets showed all P-values  $< .05$ , confirming a statistically significant difference between groups RI and C.

The Mantel-Haenszel odds ratio obtained from observed data is 0.2222 with 95% confidence interval from 0.0480 to 1.0285. The odds of lesion progression in treatment group RI were 78% less than that in treatment group C.

**Appendix Table 3**

| <b>CUMULATIVE PAIRWISE ASSESSMENT</b> | <b>Impute1</b> | <b>Impute2</b> | <b>Impute3</b> | <b>Impute4</b> | <b>Impute5</b> |
|---------------------------------------|----------------|----------------|----------------|----------------|----------------|
| <b>One-sided P-value</b>              | 0.00115        | 0.00025        | 0.0022         | 0.00035        | 0.00635        |

Cumulative PW-data after 3 years revealed significantly less caries progression in infiltrated lesions (4 RI) than control lesions (14 C) (McNemar:  $P < .003$ ). The P-values from 5 imputed datasets (ITT analysis) were all  $P < .01$ .

The Mantel-Haenszel odds ratio (OR) from observed data was 0.091 with 95% confidence interval (CI) from 0.012 to 0.704. The odds of 3yr-data being worse in RI-group were 91% less than those in group C.



**Appendix Table 4**

| <b>CUMULATIVE<br/>PW-ASSESSMENT of<br/>Baseline E2-lesions</b> | <b>Impute1</b> | <b>Impute2</b> | <b>Impute3</b> | <b>Impute4</b> | <b>Impute5</b> |
|----------------------------------------------------------------|----------------|----------------|----------------|----------------|----------------|
| <b>One-sided<br/>P-value</b>                                   | 0.01955        | 0.0078         | 0.01955        | 0.00195        | 0.0625         |

For equal lesion pairs (N=17) both starting in enamel (E2), all RI-lesions were inhibited while 35.3% of C-lesions progressed (McNemar:  $P < .016$ ). The P-values from 5 imputed datasets (ITT analysis) confirmed the significant difference between the groups by 4 out of 5 imputations to be  $P < .05$ .

A correction of 0.5 was used for the zero cell of discordant pairs to obtain a logit estimate of odds ratio. The estimated odds ratio from observed data is 0.1111 with 95% confidence interval from 0.0175 to 0.7051. For teeth with baseline E2-lesions, the odds of 3yr-data being worse in the RI-group were 89% less than that in the C-group.

**Appendix Table 5**

| <b>CUMULATIVE<br/>PW-ASSESSMENT of<br/>Baseline D1-lesions</b> | <b>Impute1</b> | <b>Impute2</b> | <b>Impute3</b> | <b>Impute4</b> | <b>Impute5</b> |
|----------------------------------------------------------------|----------------|----------------|----------------|----------------|----------------|
| <b>One-sided<br/>P-value</b>                                   | 0.0625         | 0.03515        | 0.08985        | 0.08985        | 0.08985        |

For D1-lesion pairs (N=8), no difference was found between groups (McNemar:  $P > .05$ ; confirmed by 4 out of 5 imputations showing P-values  $> 0.05$  [ITT analysis]).

The Mantel-Haenszel odds ratio obtained from observed data is 0.25 with 95% confidence interval from 0.0279 to 2.2367. For teeth with D1-lesions at baseline, the odds of 3yr-data being worse in the RI-group were 75% less than in the C-group.
